# Supplementary material
Source: PubMed Central journal article supplement (PMC11346266)
Supplement: NIHMS2018257-supplement-supplementary_material.pdf [file NIHMS2018257-supplement-supplementary_material.pdf]

**Table S1. Measured and Reported Weight in Health and Retirement Study, 2006/08-2014/16**

|                                           | Difference in weight (kg)         |                                  |                            |
|-------------------------------------------|-----------------------------------|----------------------------------|----------------------------|
|                                           | Measured weight - reported weight |                                  |                            |
|                                           | N                                 | Mean<br>(Standard Error of Mean) | 95%<br>Confidence Interval |
| <i>By cognitive function and gender</i>   |                                   |                                  |                            |
| <b>Men</b>                                |                                   |                                  |                            |
| Normal cognitive function                 | 14,251                            | 1.21 (0.03)                      | [1.15, 1.27]               |
| Cognitive impairment, without<br>dementia | 3,149                             | 0.45 (0.09)                      | [0.28, 0.63]               |
| With dementia                             | 649                               | -0.28 (0.22)                     | [-0.70, 0.15]              |
| <b>Women</b>                              |                                   |                                  |                            |
| Normal cognitive function                 | 19,323                            | 1.65 (0.03)                      | [1.59, 1.70]               |
| Cognitive impairment, without<br>dementia | 4,056                             | 1.17 (0.07)                      | [1.03, 1.31]               |
| With dementia                             | 890                               | 0.82 (0.20)                      | [0.44, 1.21]               |
| <i>By BMI category and gender</i>         |                                   |                                  |                            |
| <b>Men</b>                                |                                   |                                  |                            |
| BMI $\leq$ 24.9                           | 4,434                             | 0.44 (0.07)                      | [0.30, 0.58]               |
| 25 < BMI $\leq$ 29.9                      | 8,124                             | 1.08 (0.04)                      | [1.00, 1.15]               |
| 30 < BMI $\leq$ 34.9                      | 4,058                             | 1.46 (0.06)                      | [1.33, 1.58]               |
| BMI $\geq$ 35                             | 1,433                             | 1.31 (0.15)                      | [1.02, 1.60]               |

**Women**

|                      |       |             |              |
|----------------------|-------|-------------|--------------|
| BMI $\leq$ 24.9      | 7,871 | 1.09 (0.04) | [1.02, 1.17] |
| 25 < BMI $\leq$ 29.9 | 7,883 | 1.63 (0.04) | [1.55, 1.70] |
| 30 < BMI $\leq$ 34.9 | 5,022 | 1.99 (0.06) | [1.88, 2.11] |
| BMI $\geq$ 35        | 3,493 | 1.68 (0.09) | [1.49, 1.86] |

---
